# Supplementary material for: Comparison of physical activity levels and dietary habits between women with polycystic ovarian syndrome and healthy controls of reproductive age: a case-control study
Source: Springer Nature journal article supplement (doi:10.1186/s12905-023-02866-3), 2024-01-08
Supplement: MOESM1 [file 26606560]

## Supplementary material

| 7-Days Food Frequency Questionnaire with estimated reference values in grams for one serving and relevant food labels in Mosby's Nutritrac nutrition |                    |                                                    |                                           |                                          |                                                   |                                                                       |                                      |                                  |                                  |
|------------------------------------------------------------------------------------------------------------------------------------------------------|--------------------|----------------------------------------------------|-------------------------------------------|------------------------------------------|---------------------------------------------------|-----------------------------------------------------------------------|--------------------------------------|----------------------------------|----------------------------------|
| Food Category                                                                                                                                        | Food Groups        | Food Label in Mosby's Nutritrac nutrition analysis | Estimated amount in grams for one serving | How often did you eat in the last 7 days |                                                   |                                                                       |                                      | For Calculations                 |                                  |
|                                                                                                                                                      |                    |                                                    |                                           | Do you eat this food                     | No of days in a week when this food item is eaten | On the days when you eat this food how many times in a day you eat it | No of servings eaten at one occasion | Number of one serving calculated | Weight of one serving calculated |
|                                                                                                                                                      |                    |                                                    |                                           | Y/N                                      |                                                   |                                                                       |                                      |                                  |                                  |
| MEAT                                                                                                                                                 | Beef               | Gravy Beef                                         | 100 g                                     |                                          |                                                   |                                                                       |                                      |                                  |                                  |
|                                                                                                                                                      | Mutton/Lamb        | Lamb, Meat and Fat Cooked                          | 100 g                                     |                                          |                                                   |                                                                       |                                      |                                  |                                  |
|                                                                                                                                                      | Chicken            | Gravy, Chicken, Cooked                             | 100 g                                     |                                          |                                                   |                                                                       |                                      |                                  |                                  |
|                                                                                                                                                      | Oil or Ghee        | Oil, vegetables, canola                            | 100 ml                                    |                                          |                                                   |                                                                       |                                      |                                  |                                  |
| FISH AND POULTRY                                                                                                                                     | Fish               | Fast Food Fish                                     | 100 g                                     |                                          |                                                   |                                                                       |                                      |                                  |                                  |
|                                                                                                                                                      | Prawns/Shrimps     | Prawn                                              | 100 g                                     |                                          |                                                   |                                                                       |                                      |                                  |                                  |
|                                                                                                                                                      | Eggs               | Egg and Bread                                      | 100 g                                     |                                          |                                                   |                                                                       |                                      |                                  |                                  |
| PULSES                                                                                                                                               | Bean               | Bean                                               | 193 g                                     |                                          |                                                   |                                                                       |                                      |                                  |                                  |
|                                                                                                                                                      | Lentils            | Lentils                                            | 198 g                                     |                                          |                                                   |                                                                       |                                      |                                  |                                  |
| CEREALS                                                                                                                                              | Rice (Cooked)      | Rice, white, Long-grain                            | 158 g                                     |                                          |                                                   |                                                                       |                                      |                                  |                                  |
|                                                                                                                                                      | Pasta/Noodles      | Pasta, Homemade, with Egg                          | 128 g                                     |                                          |                                                   |                                                                       |                                      |                                  |                                  |
|                                                                                                                                                      | Bread              | Bread, Mixed-grain                                 | 28.4 g                                    |                                          |                                                   |                                                                       |                                      |                                  |                                  |
|                                                                                                                                                      | Potato             | Potato, Homemade                                   | 75 g                                      |                                          |                                                   |                                                                       |                                      |                                  |                                  |
| DAIRY PRODUCTS                                                                                                                                       | Whole Milk         | Milk                                               | 244 ml                                    |                                          |                                                   |                                                                       |                                      |                                  |                                  |
|                                                                                                                                                      | Milk without cream | Milk substitute                                    | 244 ml                                    |                                          |                                                   |                                                                       |                                      |                                  |                                  |
|                                                                                                                                                      | Milk dessert       | Pudding, Vanilla                                   | 313 ml                                    |                                          |                                                   |                                                                       |                                      |                                  |                                  |
|                                                                                                                                                      | Cream              | Cream and Milk                                     | 3 ml                                      |                                          |                                                   |                                                                       |                                      |                                  |                                  |

|            |                      |                               |        |  |  |  |  |  |  |
|------------|----------------------|-------------------------------|--------|--|--|--|--|--|--|
|            | Yogurt               | Frozen Yogurt                 | 170 ml |  |  |  |  |  |  |
|            | Lassi                | Yogurt, Plain, Whole Milk     | 170 ml |  |  |  |  |  |  |
|            | Salty lassi          | Yogurt, Skim Milk             | 170 ml |  |  |  |  |  |  |
| FATS       | Margarine            | Margarine, Regular w/salt     | 14.2 g |  |  |  |  |  |  |
|            | Butter               | Butter with Salt              | 14.2 g |  |  |  |  |  |  |
| SNACKS     | Fried Snacks         | Chips, Potato,                | 117 g  |  |  |  |  |  |  |
|            | Processed Food items | Cheese Spread, Processed      | 78 g   |  |  |  |  |  |  |
| VEGETABLES | Raw vegetables       | Vegetables, Mixed             | 91 g   |  |  |  |  |  |  |
|            | Cooked vegetables    | Vegetables, Mixed             | 91 g   |  |  |  |  |  |  |
| FRUITS     | Fresh Fruits         | Fruit Salad, Juice Pack       | 249 g  |  |  |  |  |  |  |
| SWEETS     | Chocolate            | Cookies, Wafers, Chocolate    | 24 g   |  |  |  |  |  |  |
|            | Pakistani desserts   | Raisins, Chocolate, Milk,     | 30 g   |  |  |  |  |  |  |
|            | Bakery products      | Biscuits, Plain or buttermilk | 30 g   |  |  |  |  |  |  |
| BEVERAGES  | Fresh fruit juices   | Juice, Tropical Fruits        | 250 ml |  |  |  |  |  |  |
|            | Soft drinks          | Coca Cola                     | 250 ml |  |  |  |  |  |  |
| NUTS       | Seasonal Nuts        | Almonds, Dry Roasted          | 29 ml  |  |  |  |  |  |  |
